# Supplementary material
Source: HighWire-hosted journal article supplement (https://bjgpopen.org/highwire/filestream/3064/field_highwire_adjunct_files/0/K_bjgpopen20X101086_supp.pdf)
Supplement: K_bjgpopen20X101086_supp.pdf [file K_bjgpopen20X101086_supp.pdf]

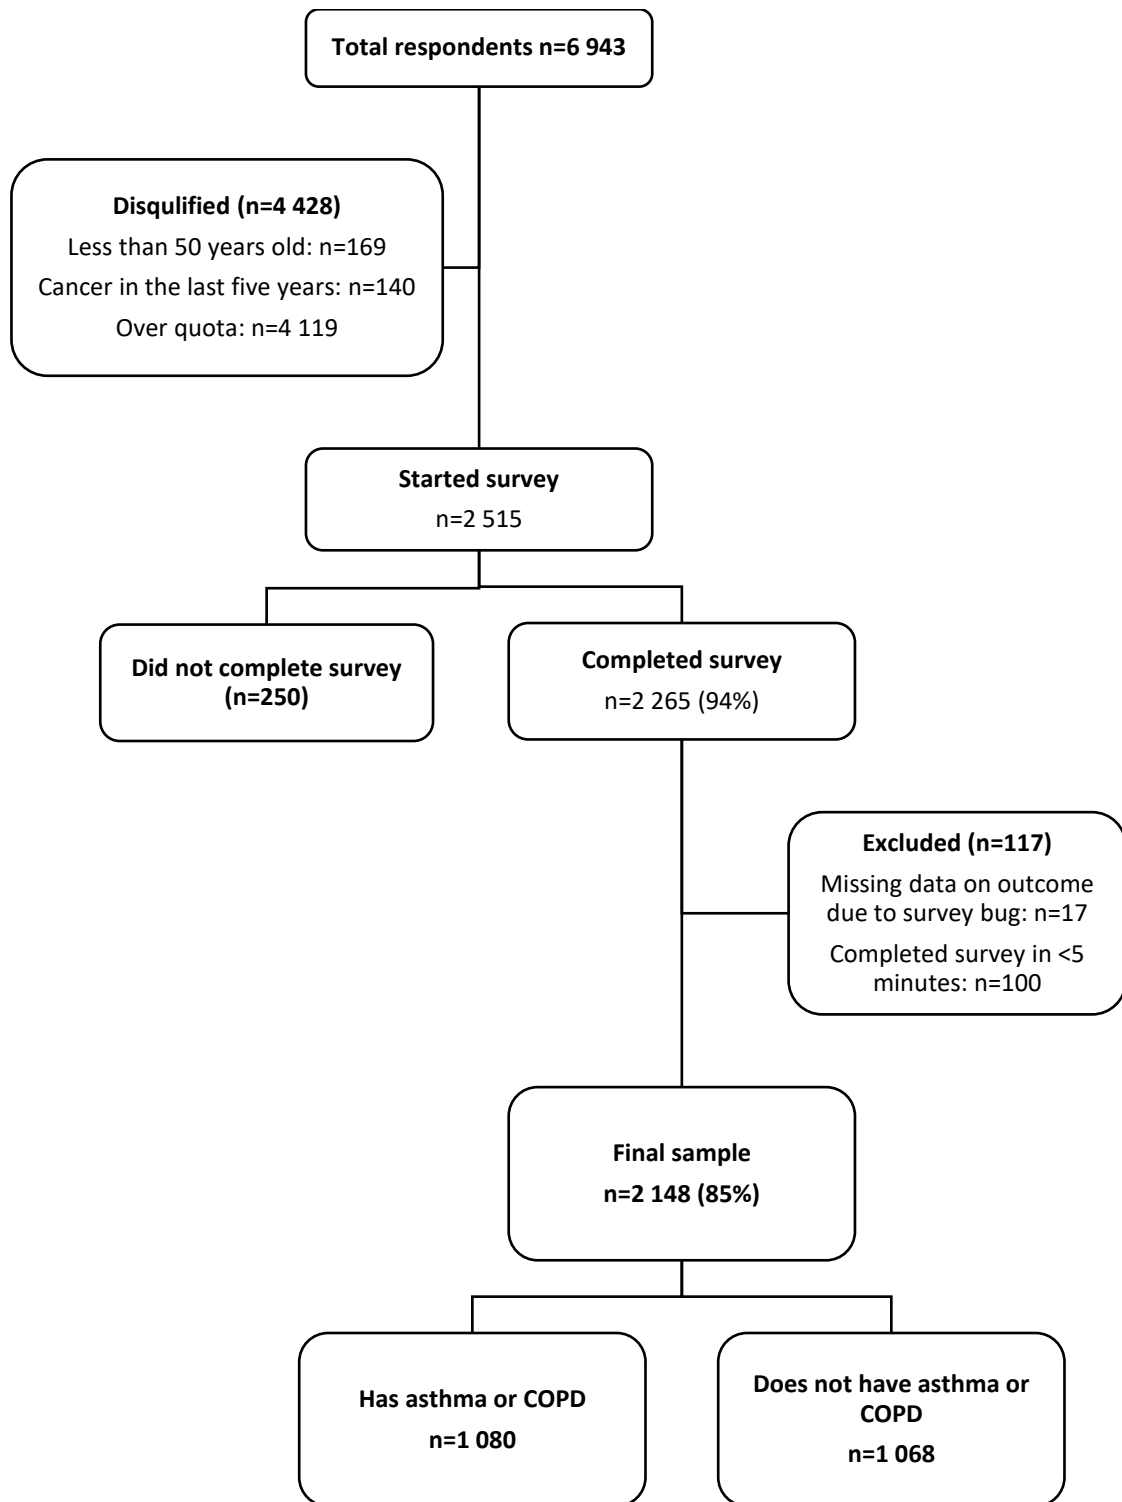

Figure S1. Response and completion rate for the online survey.

Table S1. Associations between comorbidities and symptom attribution (n=2143)

|                                          | Cancer                    | Asthma/COPD                | Other lung problems        | Infection                  | Allergy                    | Heart problems             | Obesity                   | Smoking                      | Don't know                 | Environment               |
|------------------------------------------|---------------------------|----------------------------|----------------------------|----------------------------|----------------------------|----------------------------|---------------------------|------------------------------|----------------------------|---------------------------|
|                                          | OR (95% CI)               | OR (95% CI)                | OR (95% CI)                | OR (95% CI)                | OR (95% CI)                | OR (95% CI)                | OR (95% CI)               | OR (95% CI)                  | OR (95% CI)                | OR (95% CI)               |
| <b>Unadjusted</b>                        |                           |                            |                            |                            |                            |                            |                           |                              |                            |                           |
| <b>Respiratory condition</b>             |                           |                            |                            |                            |                            |                            |                           |                              |                            |                           |
| Yes                                      | 0.96 (0.78,1.18)          | <b>3.77 (3.15,4.51)***</b> | <b>0.61 (0.46, 0.83)**</b> | 0.85 (0.7,1.02)            | <b>1.60 (1.20,2.12)**</b>  | <b>0.66 (0.51, 0.86)**</b> | 0.82 (0.49, 1.39)         | 1.10 (0.69,1.73)             | <b>0.25 (0.17,0.35)***</b> | <b>2.54 (1.39,4.65)**</b> |
| No                                       | 1.0                       | 1.0                        | 1.0                        | 1.0                        | 1.0                        | 1.0                        | 1.0                       | 1.0                          | 1.0                        | 1.0                       |
| <b>Adjusted</b>                          |                           |                            |                            |                            |                            |                            |                           |                              |                            |                           |
| <b>Respiratory condition</b>             |                           |                            |                            |                            |                            |                            |                           |                              |                            |                           |
| Yes                                      | 0.92 (0.75,1.14)          | <b>3.64 (3.02,4.39)***</b> | <b>0.64 (0.47,0.87)**</b>  | 0.84 (0.70,1.00)           | <b>1.57 (1.16,2.10)**</b>  | <b>0.61 (0.47,0.80)***</b> | 0.73 (0.43,1.26)          | 0.88 (0.53,1.44)             | <b>0.27 (0.19,0.39)***</b> | <b>2.98 (1.60,5.56)**</b> |
| No                                       | 1.0                       | 1.0                        | 1.0                        | 1.0                        | 1.0                        | 1.0                        | 1.0                       | 1.0                          | 1.0                        | 1.0                       |
| <b>Number of other health conditions</b> |                           |                            |                            |                            |                            |                            |                           |                              |                            |                           |
| 0                                        | 1.0                       | 1.0                        | 1.0                        | 1.0                        | 1.0                        | 1.0                        | 1.0                       | 1.0                          | 1.0                        | 1.0                       |
| 1                                        | 0.93 (0.68,1.28)          | 0.98 (0.75,1.30)           | 1.19 (0.76,1.86)           | 1.00 (0.76,1.32)           | 0.76 (0.48,1.19)           | 1.20 (0.79,1.83)           | 1.62 (0.61,4.32)          | 0.54 (0.23,1.27)             | 0.77 (0.51,1.18)           | 0.91 (0.39,2.11)          |
| 2                                        | 1.21 (0.88,1.66)          | 1.04 (0.79,1.38)           | 1.28 (0.82,2.00)           | <b>1.36 (1.03,1.78)*</b>   | 0.91 (0.58,1.43)           | <b>1.63 (1.08,2.47)*</b>   | 2.27 (0.89,5.78)          | 0.67 (0.30,1.47)             | <b>0.46 (0.29,0.74)**</b>  | 1.09 (0.48,2.48)          |
| 3+                                       | 1.01 (0.76,1.35)          | 1.17 (0.92,1.51)           | 0.92 (0.60,1.41)           | <b>1.41 (1.10,1.80)**</b>  | 1.26 (0.87,1.84)           | <b>1.85 (1.27,2.69)**</b>  | <b>2.73 (1.17,6.37)*</b>  | 1.30 (0.70,2.41)             | <b>0.58 (0.39,0.86)**</b>  | 0.80 (0.37,1.71)          |
| <b>Age</b>                               |                           |                            |                            |                            |                            |                            |                           |                              |                            |                           |
| 50-59                                    | 1.0                       | 1.0                        | 1.0                        | 1.0                        | 1.0                        | 1.0                        | 1.0                       | 1.0                          | 1.0                        | 1.0                       |
| 60-69                                    | 0.86 (0.68,1.09)          | 1.08 (0.87,1.33)           | 0.94 (0.66,1.35)           | 1.03 (0.84,1.26)           | 0.81 (0.59,1.11)           | 1.01 (0.75,1.36)           | 1.16 (0.65,2.07)          | <b>2.36 (1.33,4.20)**</b>    | 0.98 (0.69,1.39)           | <b>2.06 (1.10,3.87)*</b>  |
| 70+                                      | 0.80 (0.60,1.08)          | 1.11 (0.86,1.44)           | <b>1.59 (1.08,2.34)*</b>   | 0.83 (0.65,1.07)           | <b>0.55 (0.36,0.86)**</b>  | 1.20 (0.85,1.70)           | 0.65 (0.28,1.49)          | <b>2.83 (1.39,5.78)**</b>    | 0.91 (0.59,1.39)           | 1.06 (0.44,2.54)          |
| <b>Sex</b>                               |                           |                            |                            |                            |                            |                            |                           |                              |                            |                           |
| Male                                     | 1.0                       | 1.0                        | 1.0                        | 1.0                        | 1.0                        | 1.0                        | 1.0                       | 1.0                          | 1.0                        | 1.0                       |
| Female                                   | <b>1.29 (1.04,1.60)*</b>  | <b>1.85 (1.53,2.23)***</b> | 1.00 (0.73,1.36)           | <b>1.33 (1.11,1.60)**</b>  | <b>1.80 (1.33,2.44)**</b>  | <b>1.81 (1.38,2.38)***</b> | 0.89 (0.52,1.52)          | <b>0.55 (0.33,0.92)*</b>     | <b>0.40 (0.28,0.55)***</b> | 0.65 (0.37,1.14)          |
| <b>Education</b>                         |                           |                            |                            |                            |                            |                            |                           |                              |                            |                           |
| Higher education                         | 1.0                       | 1.0                        | 1.0                        | 1.0                        | 1.0                        | 1.0                        | 1.0                       | 1.0                          | 1.0                        | 1.0                       |
| No qualifications                        | <b>0.54 (0.35,0.83)**</b> | <b>0.59 (0.42,0.84)**</b>  | 0.73 (0.42,1.29)           | <b>0.48 (0.34,0.69)***</b> | <b>0.36 (0.18,0.74)**</b>  | 0.70 (0.43,1.16)           | 2.28 (0.89,5.83)          | 1.40 (0.66,2.95)             | <b>2.62 (1.60,4.30)***</b> | 0.53 (0.18,1.58)          |
| Secondary education                      | 0.85 (0.68,1.05)          | 0.87 (0.71,1.05)           | <b>0.69 (0.50,0.95)*</b>   | <b>0.75 (0.62,0.91)**</b>  | <b>0.68 (0.50,0.91)*</b>   | <b>0.69 (0.53,0.91)**</b>  | <b>2.62 (1.40,4.90)**</b> | 1.15 (0.67,1.96)             | 1.33 (0.95,1.85)           | 0.82 (0.46,1.47)          |
| <b>Ethnicity</b>                         |                           |                            |                            |                            |                            |                            |                           |                              |                            |                           |
| White                                    | 1.0                       | 1.0                        | 1.0                        | 1.0                        | 1.0                        | 1.0                        | 1.0                       | 1.0                          | 1.0                        | -                         |
| Non-white                                | <b>0.27 (0.11,0.68)**</b> | 0.69 (0.40,1.19)           | 0.88 (0.34,2.26)           | 0.64 (0.37,1.10)           | 0.64 (0.27,1.53)           | 0.48 (0.19,1.22)           | 0.68 (0.09,5.09)          | 0.94 (0.12,7.39)             | <b>2.35 (1.12,4.96)*</b>   | -                         |
| <b>Marital status</b>                    |                           |                            |                            |                            |                            |                            |                           |                              |                            |                           |
| Single                                   | 1.0                       | 1.0                        | 1.0                        | 1.0                        | 1.0                        | 1.0                        | 1.0                       | 1.0                          | 1.0                        | 1.0                       |
| Married or living with partner           | <b>0.81 (0.65,1.00)*</b>  | <b>1.35 (1.11,1.63)**</b>  | 0.74 (0.55,1.01)           | 1.02 (0.85,1.23)           | 1.05 (0.78,1.42)           | 1.32 (1.00,1.73)           | 0.94 (0.55,1.61)          | 0.73 (0.45,1.20)             | 0.85 (0.62,1.17)           | 0.63 (0.36,1.10)          |
| <b>Smoking status</b>                    |                           |                            |                            |                            |                            |                            |                           |                              |                            |                           |
| Never smoked                             | 1.0                       | 1.0                        | 1.0                        | 1.0                        | 1.0                        | 1.0                        | 1.0                       | 1.0                          | 1.0                        | 1.0                       |
| Current smoker                           | 0.95 (0.70,1.29)          | 1.01 (0.78,1.32)           | 0.82 (0.51,1.32)           | <b>0.61 (0.47,0.80)***</b> | <b>0.40 (0.25,0.64)***</b> | <b>0.52 (0.33,0.81)**</b>  | 0.91 (0.43,1.94)          | <b>15.25 (7.00,33.20)***</b> | 0.98 (0.63,1.53)           | 0.76 (0.35,1.67)          |
| Previous smoker                          | 1.26 (1.00,1.60)          | 1.03 (0.84,1.27)           | 1.15 (0.82,1.61)           | <b>0.80 (0.66,0.98)*</b>   | <b>0.70 (0.51,0.97)*</b>   | 0.96 (0.73,1.28)           | 1.04 (0.57,1.90)          | 1.72 (0.73,4.04)             | 0.97 (0.69,1.38)           | 0.76 (0.40,1.43)          |

Logistic regression models; OR (95% CI)=Odds ratio (95% Confidence Interval)

\*<0.05, \*\*<0.01, \*\*\*<0.001

Table S2. Associations between asthma/COPD and reasons for not seeing the GP (n=498)

|                                          | The GP has not been able to help me in the past for similar symptoms | The GP would not take the symptoms seriously | I don't want to be seen as a time-waster | I have other health problems that are more important | I don't think the symptoms are serious enough | I would worry about any tests I might need to have | I feel reassured by previous tests | I've had the symptoms before and I know how to manage them |
|------------------------------------------|----------------------------------------------------------------------|----------------------------------------------|------------------------------------------|------------------------------------------------------|-----------------------------------------------|----------------------------------------------------|------------------------------------|------------------------------------------------------------|
|                                          | OR (95% CI)                                                          | OR (95% CI)                                  | OR (95% CI)                              | OR (95% CI)                                          | OR (95% CI)                                   | OR (95% CI)                                        | OR (95% CI)                        | OR (95% CI)                                                |
| <b>Unadjusted</b>                        |                                                                      |                                              |                                          |                                                      |                                               |                                                    |                                    |                                                            |
| <b>Respiratory condition</b>             |                                                                      |                                              |                                          |                                                      |                                               |                                                    |                                    |                                                            |
| Yes                                      | 1.53 (0.74,3.18)                                                     | 1.26 (0.67,2.38)                             | 0.91 (0.64, 1.30)                        | 1.38 (0.74,2.58)                                     | <b>0.66 (0.46,0.95)*</b>                      | 0.43 (0.19,1.02)                                   | 2.35 (0.71, 7.72)                  | <b>5.30 (3.11,9.01)***</b>                                 |
| No                                       | 1.0                                                                  | 1.0                                          | 1.0                                      | 1.0                                                  | 1.0                                           | 1.0                                                | 1.0                                | 1.0                                                        |
| <b>Adjusted</b>                          |                                                                      |                                              |                                          |                                                      |                                               |                                                    |                                    |                                                            |
| <b>Respiratory condition</b>             |                                                                      |                                              |                                          |                                                      |                                               |                                                    |                                    |                                                            |
| No                                       | 1.0                                                                  | 1.0                                          | 1.0                                      | 1.0                                                  | 1.0                                           | 1.0                                                | 1.0                                | 1.0                                                        |
| Yes                                      | 1.21 (0.56,2.63)                                                     | 1.07 (0.54,2.11)                             | 0.81 (0.55,1.19)                         | 0.95 (0.48,1.87)                                     | 0.68 (0.46,1.00)                              | <b>0.35 (0.14,0.87)*</b>                           | 2.30 (0.65,8.11)                   | <b>5.93 (3.38,10.43)***</b>                                |
| <b>Number of other health conditions</b> |                                                                      |                                              |                                          |                                                      |                                               |                                                    |                                    |                                                            |
| 0                                        | 1.0                                                                  | 1.0                                          | 1.0                                      | 1.0                                                  | 1.0                                           | 1.0                                                | 1.0                                | 1.0                                                        |
| 1                                        | 1.49 (0.32,6.93)                                                     | 0.49 (0.14,1.68)                             | 0.92 (0.54,1.56)                         | 3.43 (0.67,17.59)                                    | 0.76 (0.44,1.31)                              | 1.05 (0.33,3.31)                                   | 1.52 (0.28,8.16)                   | 0.85 (0.41,1.77)                                           |
| 2                                        | <b>4.60 (1.22,17.44)*</b>                                            | 1.53 (0.58,4.04)                             | 0.66 (0.38,1.16)                         | <b>6.46 (1.37,30.58)*</b>                            | 0.95 (0.54,1.66)                              | 0.67 (0.19,2.44)                                   | 0.81 (0.13,5.20)                   | 0.77 (0.37,1.60)                                           |
| 3+                                       | 3.44 (0.93,12.67)                                                    | 1.78 (0.74,4.32)                             | <b>1.69 (1.03,2.79)*</b>                 | <b>11.71 (2.63,52.03)**</b>                          | 1.37 (0.81,2.30)                              | 1.00 (0.34,2.97)                                   | 1.33 (0.29,6.18)                   | 0.84 (0.44,1.63)                                           |
| <b>Age</b>                               |                                                                      |                                              |                                          |                                                      |                                               |                                                    |                                    |                                                            |
| 50-59                                    | 1.0                                                                  | 1.0                                          | 1.0                                      | 1.0                                                  | 1.0                                           | 1.0                                                | 1.0                                | 1.0                                                        |
| 60-69                                    | 0.73 (0.32,1.67)                                                     | <b>0.44 (0.20,0.96)*</b>                     | 1.23 (0.81,1.86)                         | 1.12 (0.55,2.27)                                     | 0.95 (0.62,1.46)                              | 0.87 (0.34,2.25)                                   | 1.06 (0.28,3.99)                   | <b>1.89 (1.10,3.26)*</b>                                   |
| 70+                                      | 0.66 (0.21,2.12)                                                     | 0.40 (0.13,1.21)                             | 0.81 (0.47,1.39)                         | 0.47 (0.15,1.49)                                     | <b>0.54 (0.31,0.92)*</b>                      | 1.27 (0.38,4.22)                                   | 2.26 (0.51,9.98)                   | 1.83 (0.91,3.67)                                           |
| <b>Sex</b>                               |                                                                      |                                              |                                          |                                                      |                                               |                                                    |                                    |                                                            |
| Male                                     | 1.0                                                                  | 1.0                                          | 1.0                                      | 1.0                                                  | 1.0                                           | 1.0                                                | 1.0                                | 1.0                                                        |
| Female                                   | 0.90 (0.43,1.91)                                                     | 0.96 (0.49,1.86)                             | 1.25 (0.86,1.83)                         | 0.98 (0.50,1.90)                                     | 0.73 (0.49,1.07)                              | 1.31 (0.56,3.11)                                   | 0.43 (0.13,1.39)                   | 0.97 (0.59,1.59)                                           |
| <b>Education</b>                         |                                                                      |                                              |                                          |                                                      |                                               |                                                    |                                    |                                                            |
| Higher education                         | 1.0                                                                  | 1.0                                          | 1.0                                      | 1.0                                                  | 1.0                                           | 1.0                                                | 1.0                                | 1.0                                                        |
| No qualifications                        | 2.62 (0.88,7.79)                                                     | 1.56 (0.47,5.22)                             | 0.92 (0.44,1.92)                         | 2.32 (0.83,6.48)                                     | 0.67 (0.32,1.37)                              | 3.36 (0.91,12.48)                                  | 0.67 (0.07,6.12)                   | 0.50 (0.19,1.28)                                           |
| Secondary education                      | 0.96 (0.42,2.18)                                                     | 1.13 (0.56,2.29)                             | 1.28 (0.87,1.89)                         | 1.02 (0.50,2.09)                                     | 1.01 (0.67,1.50)                              | 1.29 (0.51,3.24)                                   | 0.51 (0.15,1.81)                   | <b>0.54 (0.33,0.91)*</b>                                   |
| <b>Ethnicity</b>                         |                                                                      |                                              |                                          |                                                      |                                               |                                                    |                                    |                                                            |
| White                                    | 1.0                                                                  | 1.0                                          | 1.0                                      | 1.0                                                  | 1.0                                           | 1.0                                                | -                                  | 1.0                                                        |
| Non-white                                | 3.84 (0.40,37.19)                                                    | 5.13 (0.88,30.03)                            | 1.15 (0.27,4.82)                         | 2.05 (0.22,19.56)                                    | 0.32 (0.07,1.42)                              | 3.58 (0.34,38.06)                                  | -                                  | 0.49 (0.05,4.35)                                           |
| <b>Marital status</b>                    |                                                                      |                                              |                                          |                                                      |                                               |                                                    |                                    |                                                            |
| Single                                   | 1.0                                                                  | 1.0                                          | 1.0                                      | 1.0                                                  | 1.0                                           | 1.0                                                | 1.0                                | 1.0                                                        |
| Married or living with partner           | 0.62 (0.28,1.34)                                                     | 1.23 (0.60,2.51)                             | 1.01 (0.68,1.50)                         | 1.62 (0.78,3.35)                                     | 0.84 (0.56,1.26)                              | 0.64 (0.27,1.52)                                   | 1.15 (0.34,3.93)                   | 0.96 (0.58,1.62)                                           |
| <b>Smoking status</b>                    |                                                                      |                                              |                                          |                                                      |                                               |                                                    |                                    |                                                            |
| Never smoked                             | 1.0                                                                  | 1.0                                          | 1.0                                      | 1.0                                                  | 1.0                                           | 1.0                                                | 1.0                                | 1.0                                                        |
| Current smoker                           | 0.99 (0.36,2.72)                                                     | 1.29 (0.54,3.07)                             | 1.05 (0.63,1.74)                         | 1.06 (0.39,2.84)                                     | 0.60 (0.36,1.01)                              | 1.61 (0.60,4.28)                                   | 2.02 (0.54,7.59)                   | 1.17 (0.61,2.23)                                           |
| Previous smoker                          | 1.14 (0.48,2.74)                                                     | 1.13 (0.52,2.47)                             | 0.91 (0.59,1.39)                         | 1.83 (0.86,3.88)                                     | 0.82 (0.53,1.27)                              | 0.50 (0.16,1.51)                                   | 0.34 (0.06,1.79)                   | 0.98 (0.56,1.74)                                           |
| <b>Symptom attribution</b>               |                                                                      |                                              |                                          |                                                      |                                               |                                                    |                                    |                                                            |
| Cancer                                   | 0.90 (0.33,2.48)                                                     | 0.73 (0.29,1.84)                             | 1.26 (0.77,2.04)                         | 1.57 (0.71,3.50)                                     | <b>0.61 (0.37,0.99)*</b>                      | <b>3.32 (1.34,8.21)*</b>                           | 1.62 (0.42,6.29)                   | 0.56 (0.28,1.10)                                           |

Logistic regression models; OR (95% CI)=Odds ratio (95% Confidence Interval)

\*<0.05, \*\*<0.01, \*\*\*<0.001
